# Supplementary material for: The effect of counter ions on the far-infrared spectra of tris(triphenylphosphinegold)oxonium dimer salts
Source: Royal Society of Chemistry journal article supplement (doi:10.1039/c5ra11599j), 2015-01-01
Supplement: c5ra11599j1.pdf [file c5ra11599j1.pdf]

## Supporting Information

### The Effect of Counter-Ions on the Far-Infrared Spectra of Tris(triphenylphosphinegold)oxonium Dimer Salts

Trystan Bennett<sup>1</sup>, Alexander J. Falcinella<sup>1</sup>, Reuben J. White<sup>1</sup>, Rohul H. Adnan<sup>2,3</sup>, Vladimir Golovko<sup>2\*</sup>,  
Gunther G. Andersson<sup>4\*</sup> and Gregory F. Metha<sup>1\*</sup>

<sup>1</sup> *Department of Chemistry, University of Adelaide, South Australia 5005, AUSTRALIA*

<sup>2</sup> *The MacDiarmid Institute for Advanced Materials and Nanotechnology, Department of Chemistry,  
University of Canterbury, Christchurch 8140, NEW ZEALAND*

<sup>3</sup> *Chemistry Department, University of Malaya, 50603 Kuala Lumpur, MALAYSIA*

<sup>4</sup> *Flinders Centre for NanoScale Science and Technology, Flinders University, Adelaide SA 5001,  
AUSTRALIA*

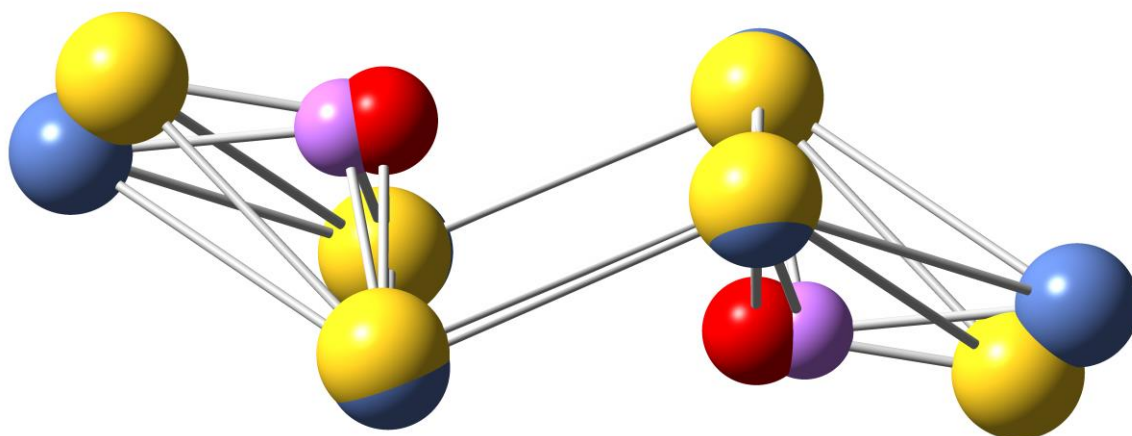

**Figure S1:** Comparison between X-ray crystallographic structure of the Au<sub>6</sub>O<sub>2</sub> core before optimization (gold in yellow, oxygen in red) and after optimization (gold in blue, oxygen in pink).

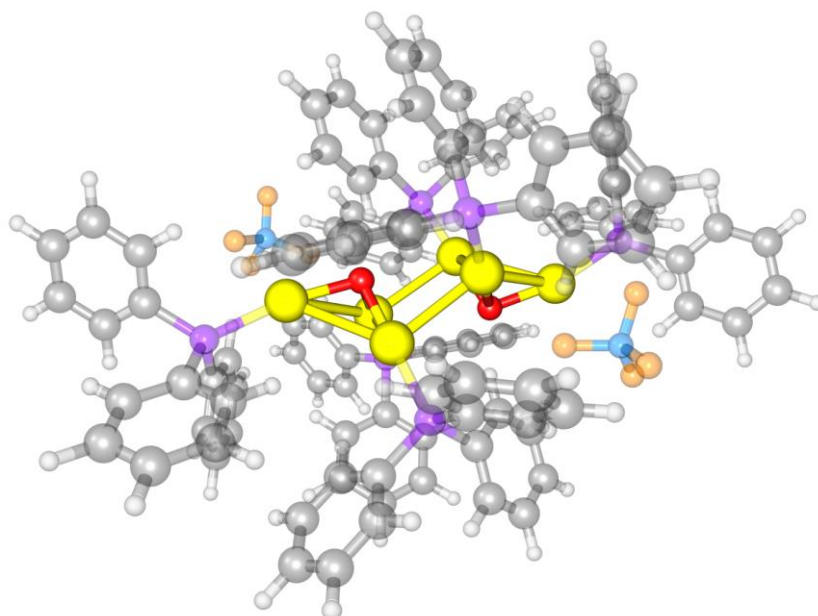

**Figure S2:** Structure of  $[(\text{Ph}_3\text{PAu})_3\text{O}]\text{BF}_4\cdot 2$ , with  $\text{PPh}_3$  ligands and counter-ions made transparent for clarity. Gold atoms are shown in yellow, oxygen in red, phosphorus in purple, boron in blue, fluorine in orange, carbon in dark grey and hydrogen in light grey.

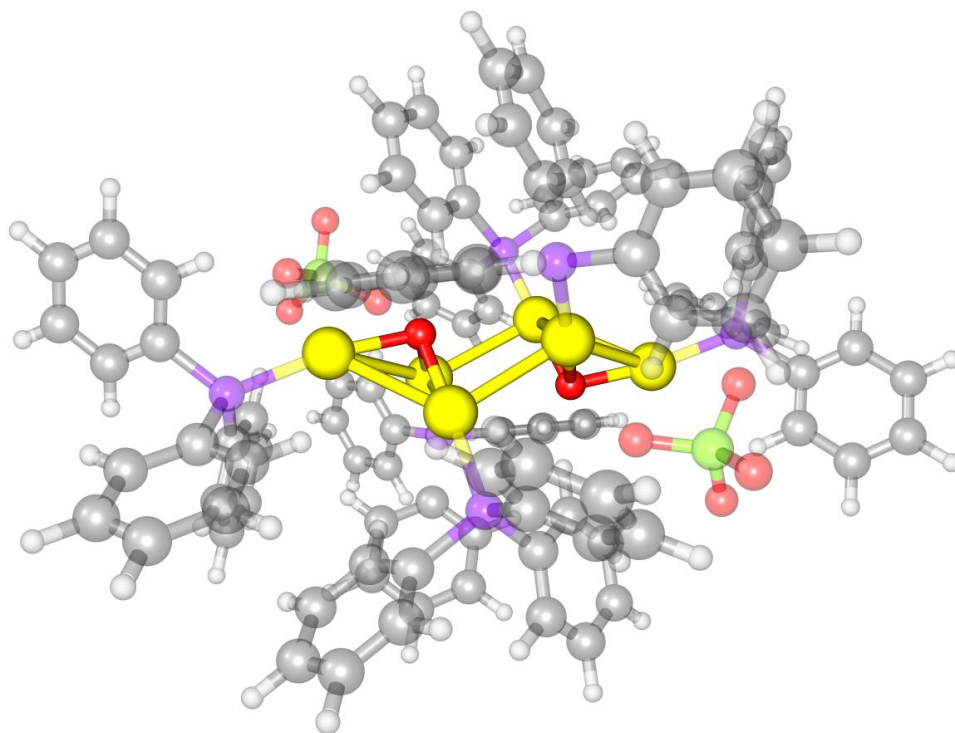

**Figure S3:** Structure of  $[[(\text{Ph}_3\text{PAu})_3\text{O}]\text{MnO}_4]_2$ , with  $\text{PPh}_3$  ligands and counter-ions made transparent for clarity. Gold atoms are shown in yellow, oxygen in red, phosphorus in purple, manganese in green, carbon in dark grey and hydrogen in light grey.

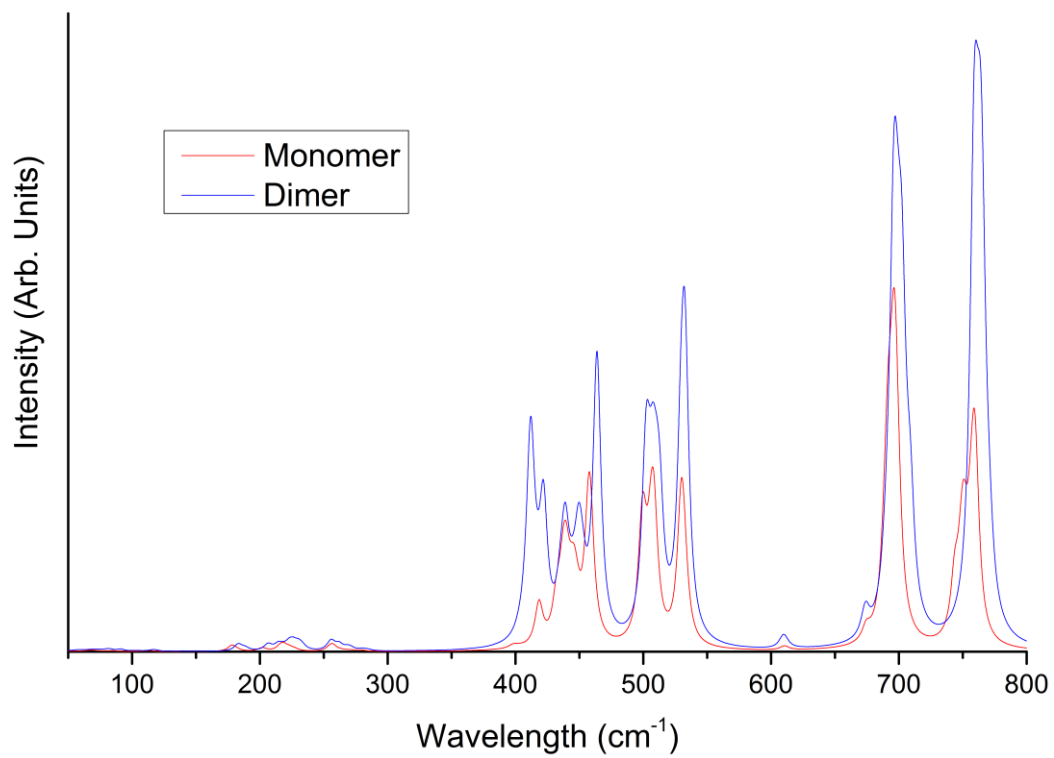

**Figure S4:** Comparison between the theoretical infra-red spectra of the  $[(\text{PPh}_3\text{Au})_3\text{O}]^-$  monomer, red, and the dimer of this species, blue.
